# Supplementary material for: Magnetic and optical properties of multifunctional core–shell radioluminescence nanoparticles
Source: Royal Society of Chemistry journal article supplement (doi:10.1039/c2jm15444g), 2012-01-01
Supplement: c2jm15444g.pdf [file c2jm15444g.pdf]

# Electronic Supplementary Information

## Magnetic and optical properties of multifunctional core-shell radioluminescence nanoparticles

Hongyu Chen <sup>a</sup>, Daniel C. Colvin <sup>b</sup>, Bin Qi <sup>c</sup>, Thomas Moore <sup>d</sup>, Jian He <sup>e</sup>, O. Thompson Mefford <sup>c</sup>, Frank Alexis <sup>d</sup>, John C. Gore <sup>b</sup>, Jeffrey N. Anker <sup>a\*</sup>

### Table of contents :

**Fig. S1** SEM images of growth of Gd(OH)CO<sub>3</sub>:Eu on spindle-shaped hematite nanoparticles without using an intermediate silica shell

**Fig. S2** Zeta potential of (A) hematite nanorice (+26.1 mV), (B) Gd(OH)CO<sub>3</sub>:Eu (+11.1 mV), (C) silica coated hematite (-35.9 mV).

**Fig. S3** SEM images of nanorice ( $\gamma$ -Fe<sub>2</sub>O<sub>3</sub>@SiO<sub>2</sub>@Gd<sub>2</sub>O<sub>3</sub>:Eu, solid structure) (A) and corresponding size distribution (B). SEM images of hollow nanorice (SiO<sub>2</sub>@Gd<sub>2</sub>O<sub>3</sub>:Eu) (C), and corresponding size distribution (D).

**Fig. S4** Photography of nanorice (A), nanoeyes (B), and hollow nanorice (C) with and without bromocresol green encapsulated by a 10 nm silica coating. Samples were obtained after centrifuged for 15 min at 4000 rpm.

**Fig. S5** The relaxation rate curves,  $1/T_2^*$ , as a function of particle concentration. To calculate relaxivity,  $r_2^*$ , the curve is fit to a straight line for concentrations up to 0.4 mg/mL) ■: nanorice, ▲: nanoeyes (iron oxide core was incubated in oxalic acid for 9.5 h), ● hollow nanorice.

**Table S1** ICP analysis of Gd<sup>3+</sup> and Fe<sup>3+</sup> in nanorice, nanoeyes, and hollow nanorice in 0.8, 0.4, 0.1, 0.05 mg/ml of solution. The 0 value for Fe<sup>3+</sup> means < 0.01 mg/L, i.e. below the limit of detection.

**Table S2**  $r_2$  and  $r_2^*$  calculated based on molar concentration Gd<sup>3+</sup>, Fe<sup>3+</sup>, Gd<sup>3+</sup>+Fe<sup>3+</sup>, and weight concentration of particles.

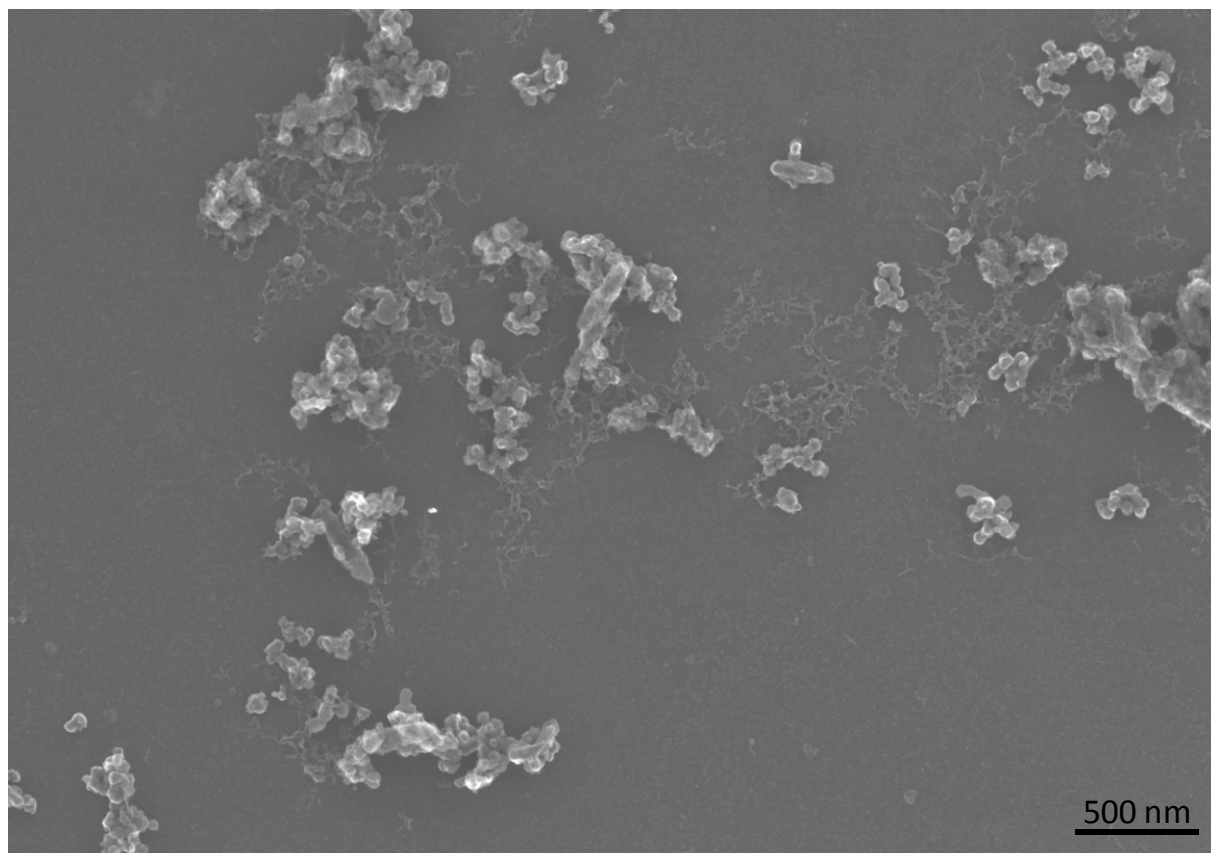

**Fig. S1.** SEM images of growth of Gd(OH)CO<sub>3</sub>:Eu on spindle-shaped hematite nanoparticles without using an intermediate silica shell.

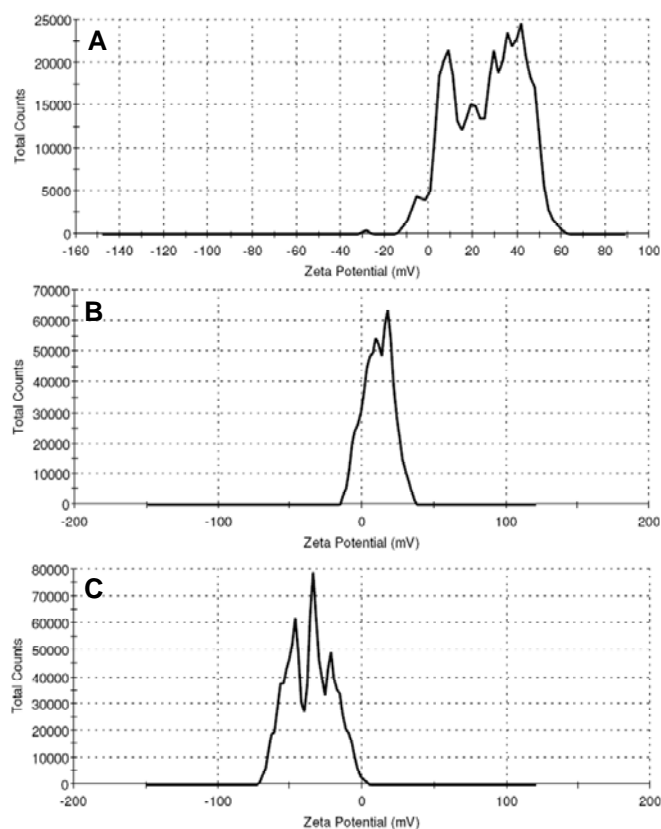

**Fig. S2.** Zeta potential of (A) hematite nanorice (+26.1 mV), (B) Gd(OH)CO<sub>3</sub>:Eu (+11.1 mV), (C) silica coated hematite (-35.9 mV).

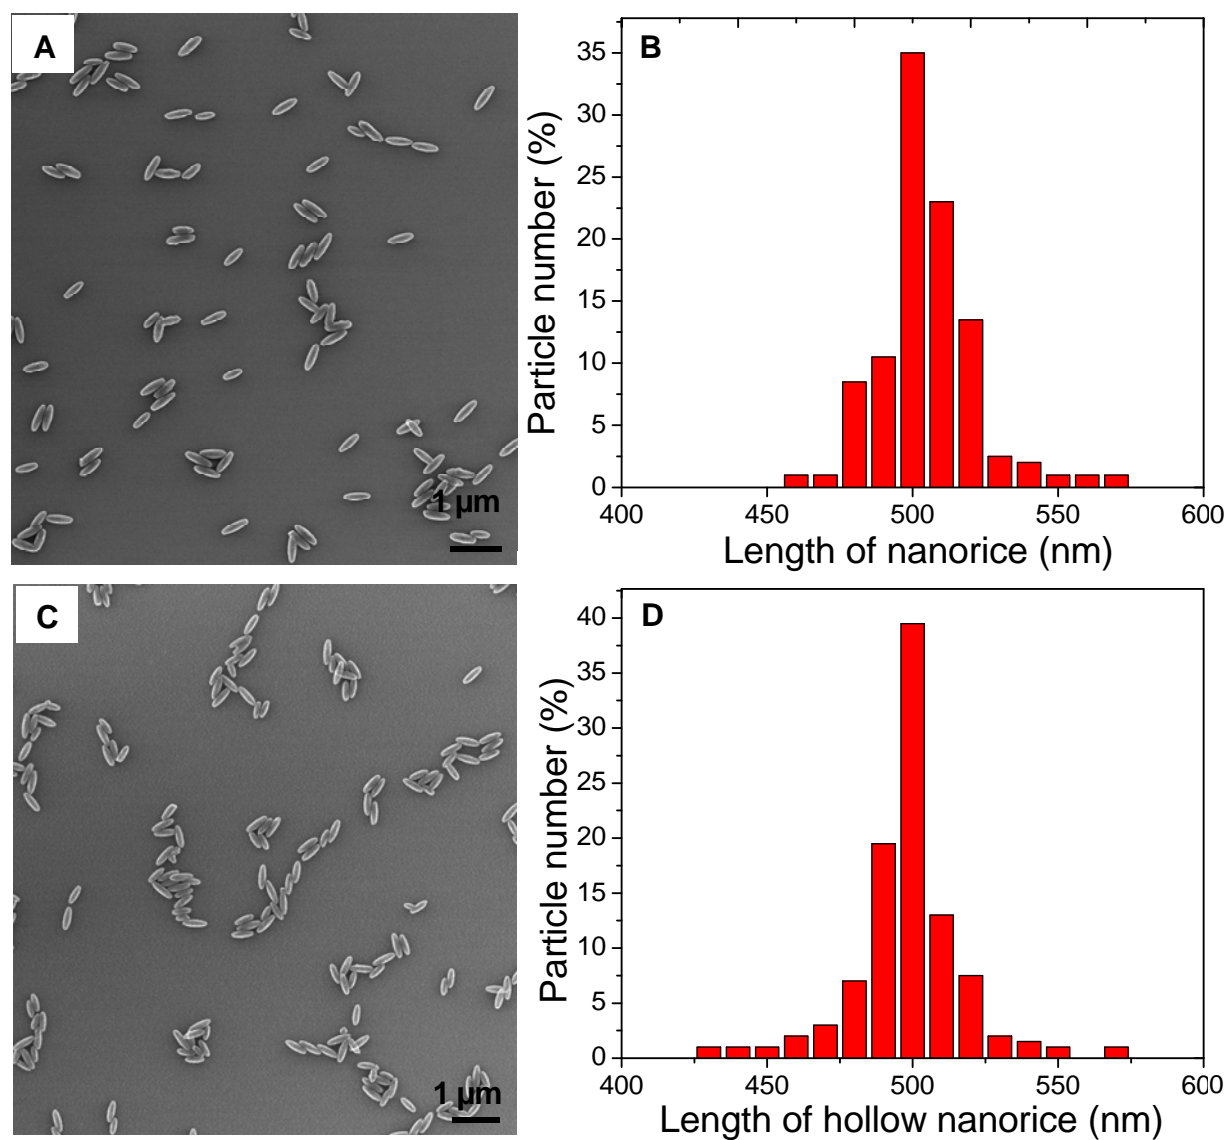

**Fig. S3.** SEM images of nanorice ( $\gamma\text{-Fe}_2\text{O}_3@\text{SiO}_2@\text{Gd}_2\text{O}_3:\text{Eu}$ , solid structure) (A) and corresponding size distribution (B). SEM images of hollow nanorice ( $\text{SiO}_2@\text{Gd}_2\text{O}_3:\text{Eu}$ ) (C), and corresponding size distribution (D).

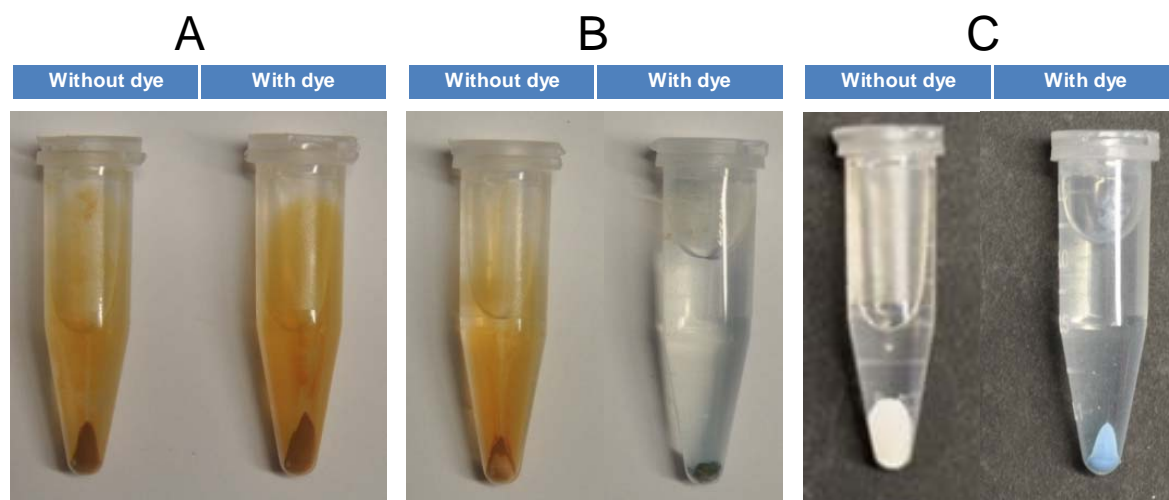

**Fig. S4** Photography of nanorice (A), nanoeyes (B), and hollow nanorice (C) without and with bromocresol green dye encapsulated by a ~10 nm silica coating. Samples were obtained after centrifuged for 15 min at 4000 rpm.

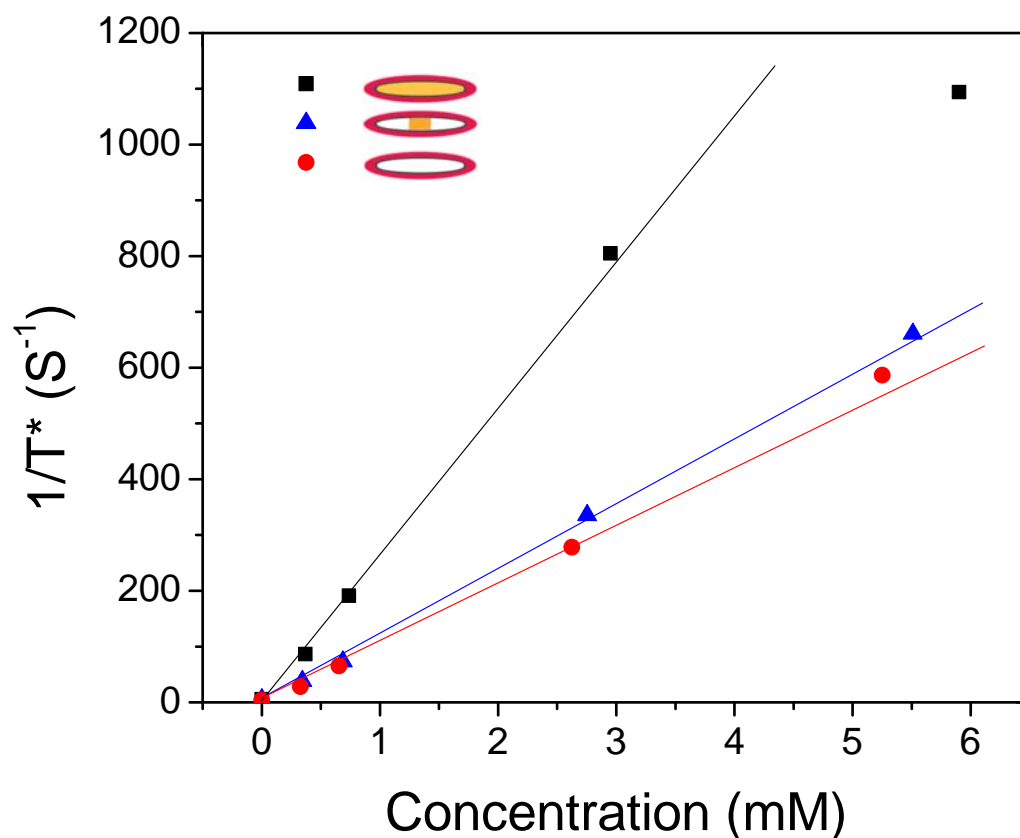

**Fig. S5** The relaxation rate curves,  $1/T_2^*$ , as a function of particle concentration. To calculate relaxivity,  $r_2^*$ , the curve is fit to a straight line for concentrations up to 0.4 mg/mL) ■: nanorice, ▲: nanoeyes (iron oxide core was incubated in oxalic acid for 9.5 h), ●: hollow nanorice.

**Table S1.** ICP analysis of  $Gd^{3+}$  and  $Fe^{3+}$  in nanorice, nanoeyes, and hollow nanorice in 0.8, 0.4, 0.1, 0.05 mg/ml of solution. The 0 value for  $Fe^{3+}$  means  $< 0.01$  mg/L, i.e. below the limit of detection.

| Weight concentration<br>Type of nanoparticle |           | 0.8 mg/ml | 0.4 mg/ml | 0.1 mg/ml | 0.05 mg/ml |
|----------------------------------------------|-----------|-----------|-----------|-----------|------------|
| Nanorice                                     | $Gd^{3+}$ | 4.700 mM  | 2.350 mM  | 0.588 mM  | 0.294 mM   |
|                                              | $Fe^{3+}$ | 1.200 mM  | 0.600 mM  | 0.150 mM  | 0.075 mM   |
| Nanoeyes                                     | $Gd^{3+}$ | 4.780 mM  | 2.390 mM  | 0.598 mM  | 0.299 mM   |
|                                              | $Fe^{3+}$ | 0.730 mM  | 0.365 mM  | 0.091 mM  | 0.046 mM   |
| Hollow nanorice                              | $Gd^{3+}$ | 5.250 mM  | 2.626 mM  | 0.656 mM  | 0.328 mM   |
|                                              | $Fe^{3+}$ | 0 mM      | 0 mM      | 0 mM      | 0 mM       |

**Table S2.**  $r_2$  and  $r_2^*$  calculated based on molar concentration  $Gd^{3+}$ ,  $Fe^{3+}$ ,  $Gd^{3+}+Fe^{3+}$ , and weight concentration of particles.

| Relaxivity<br>Type of nanoparticle |                                           | $r_2$                  | $r_2^*$                 |
|------------------------------------|-------------------------------------------|------------------------|-------------------------|
| Nanorice                           | Weight concentration                      | 514 ml $mg^{-1}s^{-1}$ | 2029 ml $mg^{-1}s^{-1}$ |
|                                    | Molar concentration ( $Gd^{3+}$ )         | 86.28 $mM^{-1}s^{-1}$  | 344.10 $mM^{-1}s^{-1}$  |
|                                    | Molar concentration ( $Fe^{3+}$ )         | 337.92 $mM^{-1}s^{-1}$ | 1347.71 $mM^{-1}s^{-1}$ |
|                                    | Molar concentration ( $Gd^{3+}+Fe^{3+}$ ) | 68.73 $mM^{-1}s^{-1}$  | 274.11 $mM^{-1}s^{-1}$  |
| Nanoeyes                           | Weight concentration                      | 454 ml $mg^{-1}s^{-1}$ | 847 ml $mg^{-1}s^{-1}$  |
|                                    | Molar concentration ( $Gd^{3+}$ )         | 66.97 $mM^{-1}s^{-1}$  | 138.82 $mM^{-1}s^{-1}$  |
|                                    | Molar concentration ( $Fe^{3+}$ )         | 438.54 $mM^{-1}s^{-1}$ | 909.00 $mM^{-1}s^{-1}$  |
|                                    | Molar concentration ( $Gd^{3+}+Fe^{3+}$ ) | 58.10 $mM^{-1}s^{-1}$  | 120.43 $mM^{-1}s^{-1}$  |
| Hollow nanorice                    | Weight concentration                      | 322 ml $mg^{-1}s^{-1}$ | 701 ml $mg^{-1}s^{-1}$  |
|                                    | Molar concentration ( $Gd^{3+}$ )         | 46.00 $mM^{-1}s^{-1}$  | 111.76 $mM^{-1}s^{-1}$  |
